# Supplementary material
Source: PubMed Central journal article supplement (PMC3567647)
Supplement: supp_M112.385682_jbc.M112.385682-1.pdf [file supp_M112.385682_jbc.M112.385682-1.pdf]

### **Supplement figure legends:**

**Supplement figure 1:  $^{13}\text{C}$ -amino acid, insulin, glucagon and  $[\text{Ca}^{2+}]_i$  response to glucose stimulation in mouse islets.** 500 to 600 isolated and cultured normal mouse islets were pre-incubated with glucose-free KRBB for 60 min, then incubated with 4 mM amino acid mixture plus different concentrations of  $[\text{U-}^{13}\text{C}]$ glucose for another 120 min; intracellular amino acids and their  $^{13}\text{C}$  enrichments were determined. Panel A shows insulin and glucagon secretion (vs. G, 0 mM, \*:  $p < 0.05$ ,  $n=3$ ); Panel B to F show  $^{13}\text{C}$ -amino acid production in response to different concentrations of  $[\text{U-}^{13}\text{C}]$ glucose (B: Ala; C: Asp; D: Glu; E: GABA; F: Gln; vs. G, 3 mM, \*:  $p < 0.05$ ,  $n=3$ ). Panel G shows  $[\text{Ca}^{2+}]_i$  responses to different concentrations of glucose in normal mouse islets (representative data from 3 separate experiments).

**Supplement figure 2: Gene expression of 3 isoforms of Malic enzyme (1, 2 and 3), GAD and GS in normal human islets.** Gene expression was detected by RT-PCR in normal human islets. Data represent 3 separate preparations of normal human islets.

**Supplemental figure 3: Gene expression of GHBDH, SSA reductase, GlyR- $\alpha$ 1 and GHBR in normal and T2D human islets.** Gene expression were detected by RT-PCR in normal human islets (black filled bar,  $n=5$ ), T2D- $\alpha$ GR (gray filled bar,  $n=3$ ) and T2D- $\alpha$ NGR (open bar,  $n=3$ ).

Supplemental Table 1: Pancreas donors' information

|        |    | <b>Gender</b> | <b>Age</b> | <b>Race</b> | <b>BMI</b> | <b>Blood glucose and (HbA1C)*</b> | <b>History (years)</b> | <b>Treatment</b>                                    | <b>Note</b> |
|--------|----|---------------|------------|-------------|------------|-----------------------------------|------------------------|-----------------------------------------------------|-------------|
| T2D    | 1  | F             | 61         | White       | 29.6       | 425                               | 4                      | Oral medicine <sup>#</sup>                          | <i>αNGR</i> |
|        | 2  | M             | 48         | White       | 26.2       | 250                               | 2                      | Oral medicine <sup>#</sup>                          |             |
|        | 3  | M             | 45         | White       | 37         | 165                               | 15                     | Oral medicine <sup>#</sup> then insulin for 5 years |             |
|        | 1  | M             | 55         | White       | 29.9       | NA (6.5)                          | 4                      | Metformin for 4 years                               | <i>αGR</i>  |
|        | 2  | M             | 53         | White       | 28.3       | 223 (8.3)                         | 5                      | Metformin for 5 years                               |             |
|        | 3  | F             | 38         | White       | 29         | 119 (6.5)                         | 1                      | Diet                                                |             |
| Normal | 1  | M             | 32         | Asian       | 27.2       | 113                               |                        |                                                     |             |
|        | 2  | F             | 22         | Black       | 25         | 84                                |                        |                                                     |             |
|        | 3  | F             | 57         | White       | 21.1       | 106                               |                        |                                                     |             |
|        | 4  | M             | 51         | Hispanic    | 26.1       | 108                               |                        |                                                     |             |
|        | 5  | M             | 57         | White       | 26.5       | 120                               |                        |                                                     |             |
|        | 6  | F             | 28         | Black       | 19.5       | 83                                |                        |                                                     |             |
|        | 7  | M             | 56         | White       | 24.7       | 123                               |                        |                                                     |             |
|        | 8  | F             | 33         | Black       | 31.1       | 98                                |                        |                                                     |             |
|        | 9  | m             | 52         | White       | 28.7       | 121                               |                        |                                                     |             |
|        | 10 | M             | 57         | White       | 26.5       | NA                                |                        |                                                     |             |
|        | 11 | M             | 53         | White       | 31         | 149                               |                        |                                                     |             |
|        | 12 | M             | 19         | Black       | 35         | 140                               |                        |                                                     |             |
|        | 13 | M             | 43         | White       | 26.2       | 102                               |                        |                                                     |             |
|        | 14 | F             | 52         | White       | 28.7       | 103                               |                        |                                                     |             |
|        | 15 | F             | 53         | White       | 21.1       | 106                               |                        |                                                     |             |
|        | 16 | M             | 36         | Black       | 39.5       | 84                                |                        |                                                     |             |
|        | 17 | F             | 54         | Black       | 27.6       | 102                               |                        |                                                     |             |
|        | 18 | M             | 28         | White       | 29.4       | 103                               |                        |                                                     |             |
|        | 19 | M             | 53         | White       | 29         | 144                               |                        |                                                     |             |
|        | 20 | M             | 47         | Black       | 28.6       | 118                               |                        |                                                     |             |
|        | 21 | M             | 22         | White       | 22.4       | 104                               |                        |                                                     |             |

\*: Blood glucose or HbA1C were measured when admitted to hospital. NA: data not available, <sup>#</sup>: details of oral medication are unknown. Note that the blood glucose values are not clearly diagnostic because of the uncontrolled circumstances surrounding admission. Normal HbA1C values in control subjects used in another study performed during the same time period as the present one were 5.7±0.05% (1). The diagnosis of T2D in this

group of subjects is thus based primarily on case histories, retrospectively validated by in vitro insulin release data and the results of the respirometry test as presented in the text.

References:

1. Doliba, N.M., Qin, W., Najafi, H., Liu, C., Buettger, C.W., Sotiris, J., Collins, H.W., Li, C., Stanley, C.A., Wilson, D.F., et al. 2012. Glucokinase activation repairs defective bioenergetics of islets of Langerhans isolated from type 2 diabetics. *Am J Physiol Endocrinol Metab* 302:E87-E102.

Supplement table 2: Sequences of the primers of targeted genes

| Gene     | Protein                                  | Sequence                                      |                                                |
|----------|------------------------------------------|-----------------------------------------------|------------------------------------------------|
|          |                                          | forward                                       | reverse                                        |
| ACTB     | beta-actin                               | CTCTTCCAGCCTTCCTTCT                           | AGCACTGTGTTGGCGTACAG                           |
| HK1      | Hexokinase 1                             | AGACGCACCCACAGTATTCC                          | CGCATCCTCTTCTTCACCTC                           |
| GAD      | Glutamate Decarboxylase                  | TTCCTCCAAGCTTGCCTACT<br>CACAACTCAGCGGCATAGA*  | ACCATGCGGAAGAAATTGAC<br>ATCTGGTTGCATCCTTGGAG*  |
| GDH      | Glutamate Dehydrogenase                  | GGAGGTTACCATGGAGCTA                           | CCTATGGTGCTGGCATAGGT                           |
| BDH1     | GHB Dehydrogenase                        | TCACCAAGTTCGGGGTAGAG<br>CGGCTAGTGGCAAAGCTATC* | CTTCTTGCCGTAGTCCTTGC<br>GTTGCAGACATTGAGCTGGA*  |
| GCK      | Glucokinase                              | CACTGCTGAGATGCTCTTCG                          | CCACGACATTGTTCCCTTCT                           |
| GLRA1    | Glycine receptor, alpha 1                | TAGGCATCACCCTGTGCTC<br>CAGGATCAGGCCCAACTTTA*  | AGCTCCTTATGTTGCCGAGA<br>GATGGGTCAAGGTCCAGAGA*  |
| GLRB     | Glycine receptor, beta                   | AGTGCCCTGGGTATCTTCT                           | CCTTTTCCATCTGCTTGCTC                           |
| AKR7A2   | SSA Reductase                            | CAGCTGGAGACGTCATTGAA<br>TGTGGAGGAGACACTTCGTG* | GCATAGTTGGAGAGGCCAAG<br>CATGCCCTGGTACACAGTTG*  |
| PC       | Pyruvate Carboxylase                     | GCCTGGGAAGGTGATAGACA                          | GGGTGAGGTCACCACAGTCT                           |
| TSPAN-17 | GHB Receptor                             | GGTAGTTGGAGGCGTCATGT<br>CAGCGGAAGATGTCCTCAAT* | GGTTGAGCTGGTCTCGAATC<br>TGTACTIONCAGAGGTTCTGG* |
| INS      | Insulin                                  | CTACCTAGTGTGCGGGGAAC<br>GGAGCGTGGCTTCTTCTACA* | GCTGGTAGAGGGAGCAGATG<br>GTGCAGCACTGATCCACAAT*  |
| GCG      | Glucagon                                 | CATTCACAGGGCACATTAC<br>GAAGACAAACGCCACTCACA*  | CAGCTTGGCCTTCCAAATAA<br>CAGCATGCCTCTCAAATTCA*  |
| ME1      | Malic Enzyme, 1                          | ACCCTGGAAGAGAGACAGCA                          | AGCCAAGAATACGCTCTCCA                           |
| ME2      | Malic Enzyme, 2                          | ATGGGCTTGTACCAGAAACG                          | TATGCTCTCTGGGGCTGAGT                           |
| ME3      | Malic Enzyme, 3                          | TCACCAGGAACCCTCATCTC                          | TTGTCCAGGTCACCTCTGATG                          |
| GLUL     | Glutamine Synthetase                     | TGGGAGCAGACAGAGCCTAT                          | CAGGAATGGGCTTAGGATCA                           |
| GAPDH    | Glyceraldehyde-3-phosphate Dehydrogenase | CAATGACCCCTTCATTGACC<br>AACTTTGGCATTGTGGAAGG* | GACAAGCTTCCCGTTCTCAG<br>GGATGCAGGGATGATGTTCT*  |

\*: primers for mouse

Supplement Table 3: Intracellular amino acid (*nmol/mg islets protein*) responses to 5, 10 and 25 mM glucose in normal human islets

| <i>n=4</i>       | <b>G, 0</b>     |             | <b>G, 5 mM</b>        |                      | <b>G, 10 mM</b>       |                      | <b>G, 25 mM</b>       |                       |
|------------------|-----------------|-------------|-----------------------|----------------------|-----------------------|----------------------|-----------------------|-----------------------|
|                  | <b>VGB (mM)</b> |             | <b>VGB (mM)</b>       |                      | <b>VGB (mM)</b>       |                      | <b>VGB (mM)</b>       |                       |
|                  | <b>0</b>        | <b>1.55</b> | <b>0</b>              | <b>1.55</b>          | <b>0</b>              | <b>1.55</b>          | <b>0</b>              | <b>1.55</b>           |
| <b>Alanine</b>   | 2.1±0.3         | 2.0±0.1     | 3.5±0.3 <sup>a</sup>  | 3.7±0.5 <sup>a</sup> | 3.9±0.3 <sup>a</sup>  | 3.7±0.6 <sup>a</sup> | 5.2±0.8 <sup>a</sup>  | 6.6±2.2 <sup>a</sup>  |
| <b>Arginine</b>  | 16.4±1.7        | 19.7±4.8    | 16.8±3.2              | 19.8±3.6             | 16.4±2.1              | 16.5±2.1             | 18.2±2.7              | 20.8±3.1              |
| <b>Aspartate</b> | 13.3±2.5        | 12.4±3.1    | 10.5±2.1 <sup>a</sup> | 8.0±1.7 <sup>a</sup> | 9.6±1.4               | 7.8±1.6 <sup>a</sup> | 10.1±1.7 <sup>a</sup> | 8.5±1.4 <sup>a</sup>  |
| <b>GABA</b>      | 23.1±2.0        | 36.1±2.4*   | 17.7±2.3 <sup>b</sup> | 31.9±2.5*            | 13.8±1.2 <sup>b</sup> | 31.2±2.1*            | 14.4±1.8 <sup>a</sup> | 31.8±1.8*             |
| <b>Glutamate</b> | 23.5±2.3        | 23.7±2.3    | 32.7±5.6              | 28.3±4.0             | 30.1±4.1              | 27.2±3.9             | 33.5±5.4 <sup>a</sup> | 33.2±5.1 <sup>a</sup> |
| <b>Glutamine</b> | 1.1±0.1         | 1.2±0.0     | 1.1±0.4               | 1.8±0.4              | 1.5±0.2               | 1.6±0.3              | 1.6±0.2               | 2.8±1.2               |
| <b>Sum</b>       | 81±8            | 80±17       | 84±13                 | 93±10                | 76±8                  | 88±8                 | 85±12                 | 104±10                |

vs. G 0, *a*:  $p < 0.05$ , *b*:  $p < 0.01$ ; vs. VGB 0, \*:  $p < 0.01$ .

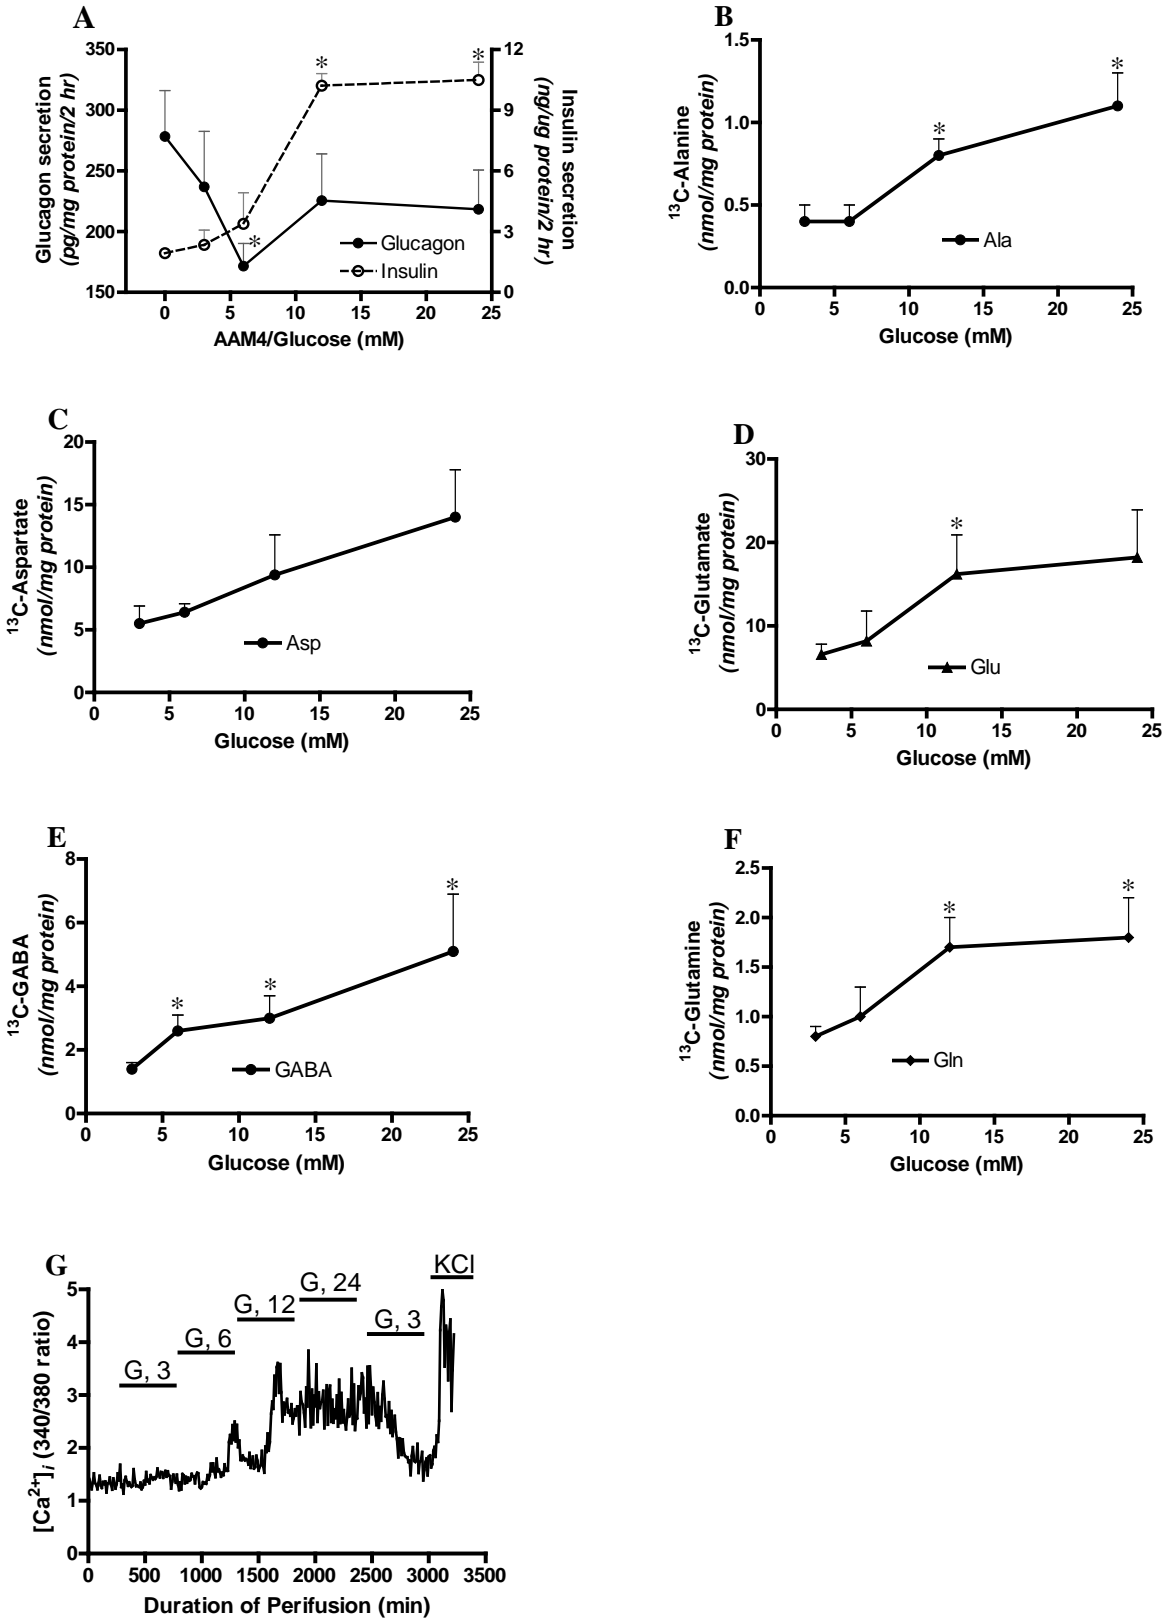

Supplement Figure 1

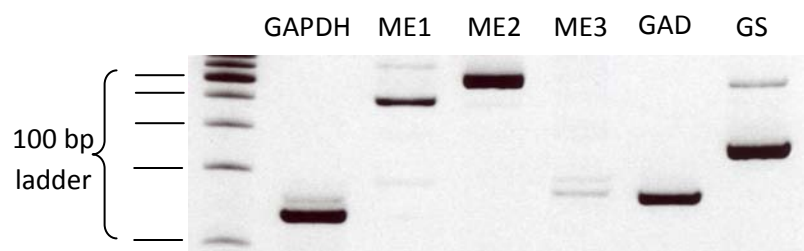

Supplemental figure 2

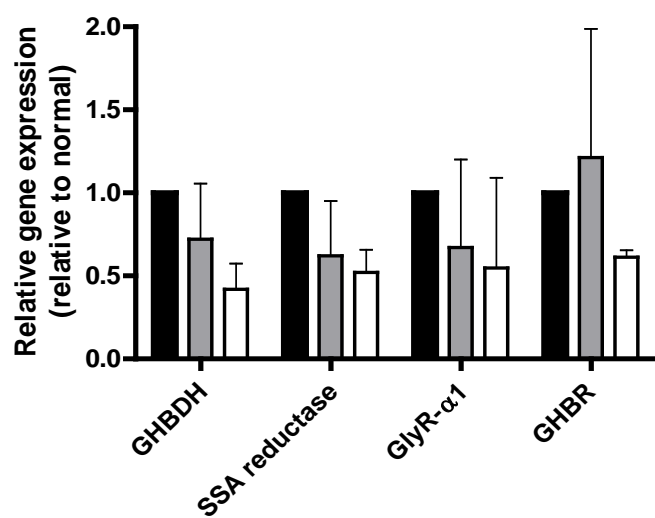

Supplemental figure 3
